# Supplementary material for: All-in-One digital microfluidics pipeline for proteomic sample preparation and analysis
Source: Royal Society of Chemistry journal article supplement (doi:10.1039/d3sc00560g), 2023-01-01
Supplement: d3sc00560g2.pdf [file d3sc00560g2.pdf]

## Supporting Information

### All-in-one Digital Microfluidics Pipeline for Proteomic Sample Preparation and Analysis

Jiaxi Peng<sup>1,2,3</sup>, Calvin Chan<sup>1</sup>, Shuailong Zhang<sup>1,6,7</sup>, Alexandros A. Sklavounos<sup>1,2</sup>, Maxwell E. Olson<sup>1</sup>, Erica Y. Scott<sup>1,2,3</sup>, Yechen Hu<sup>1,2,3</sup>, Vigneshwar Rajesh<sup>1</sup>, Bingyu B. Li<sup>1,2</sup>, M. Dean Chamberlain<sup>1,2,3,8</sup>, Shen Zhang<sup>4,9</sup>, Hui Peng<sup>1,5</sup>, Aaron R. Wheeler<sup>1,2,3\*</sup>

1. Department of Chemistry, University of Toronto, 80 St. George Street, Toronto, ON, M5S 3H6, Canada.
2. Donnelly Centre for Cellular and Biomolecular Research, University of Toronto, 160 College Street, Toronto, ON, M5S 3E1, Canada.
3. Institute of Biomedical Engineering, University of Toronto, 164 College Street, Toronto, ON, M5S 3G9, Canada.
4. Lunenfeld-Tanenbaum Research Institute, Mount Sinai Hospital, 600 University Avenue, Toronto, ON, M5G 1X5, Canada.
5. School of Environment, University of Toronto, 33 Willcocks Street, Toronto, ON, M5S 3E8, Canada.
6. School of Mechatronical Engineering, Beijing Institute of Technology, Beijing, 100081, China
7. Beijing Advanced Innovation Center for Intelligent Robots and Systems, Beijing Institute of Technology, Beijing, 100081, China
8. Saskatchewan Cancer Agency, University of Saskatchewan, 107 Wiggins Road, Saskatoon, SK S7N 5E5
9. Clinical Research Center for Reproduction and Genetics in Hunan Province, Reproductive and Genetic Hospital of CITIC-XIANGYA, Changsha, Hunan, 410000, China

\*Contact details for the corresponding author: Aaron R. Wheeler

Email: [aaron.wheeler@utoronto.ca](mailto:aaron.wheeler@utoronto.ca); Tel: 416-946-3866; Fax: 416-946-3865

Address: 80 St. George Street, Department of Chemistry, University of Toronto, Toronto, ON, M5S 3H6, Canada

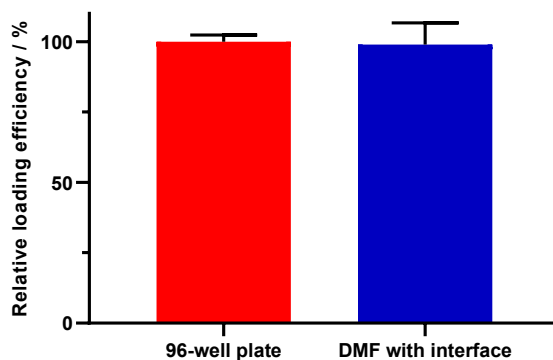

**Fig. S1** Sample loading efficiency from conical bottomed 96-well plates (red) and the custom HPLC-DMF interface (blue). Identical volumes and concentrations of BSA digest standard (5  $\mu$ L, 1 ng/ $\mu$ L) were injected into the autosampler and analyzed by HPLC-MS. The average value of MaxQuant protein intensities for BSA for both systems were normalized to those from well-plates. Error bars represent 1 st. dev. from n = 3 replicates per condition.

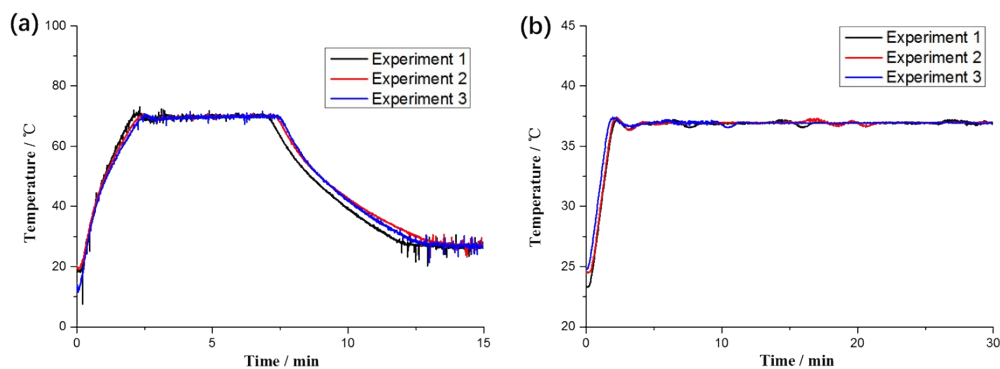

**Fig. S2** Temperature control profiles of the two heating units. The temperatures in three successive runs (black, red, blue) were monitored by embedded thermistors during (a) a denaturation/reduction step (step 2) using the auxiliary heating unit, and (b) an enzymatic digestion step (step 4) using the integrated heating unit.



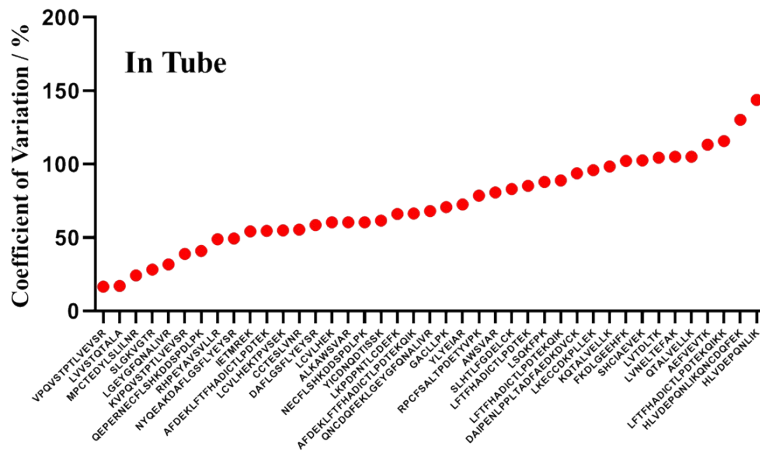

**Fig. S5** Coefficient of variation (CV) of quantified peptides from BSA prepared in tubes. Each red spot represents the CV observed between the intensities of each peptide tagged with light, medium, or heavy label.

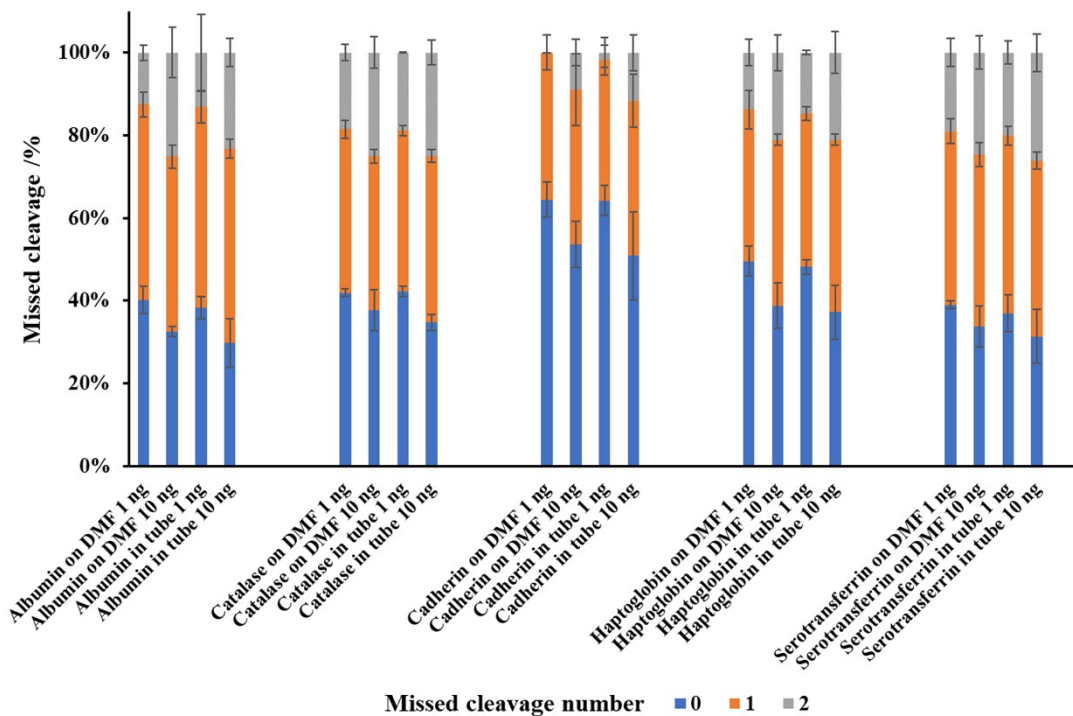

**Fig. S6** Distribution of missed cleavages of identified peptides from a mixture of 1 ng or 10 ng of each 5 standard proteins (albumin, catalase, cadherin, haptoglobin, and serotransferrin) prepared on DMF and in tube. The number 0 (blue), 1 (orange), and 2 (grey) represents the number of missed cleavages on the peptide. Error bars are  $\pm 1$  st. dev. for  $n = 3$  replicates per condition.

**Table S1** Differentially quantified proteins between small breast cancer tumour sample (CP531533) and healthy breast tissue sample (CP565563). A positive log<sub>2</sub> fold-change represents higher quantitation in CP531533, while a negative log<sub>2</sub> fold-change represents lower quantitation in CP531533.

| Entry name | Difference (log <sub>2</sub> fold change) | -Log (P-value) |
|------------|-------------------------------------------|----------------|
| PGS2       | 1.5097                                    | 4.6449         |
| ARY1       | 1.3308                                    | 2.1600         |
| K1C18      | 1.1173                                    | 3.7753         |
| UGDH       | 1.0673                                    | 2.4559         |
| A0A0C4DGM1 | 1.0648                                    | 2.4298         |
| ASPN       | 1.0617                                    | 3.0345         |
| CYB5       | 1.0615                                    | 1.6568         |
| ZA2G       | 1.0133                                    | 3.1131         |
| IGLC7      | 1.0034                                    | 3.8842         |
| S10AG      | 1.0018                                    | 2.9173         |
| LUM        | 0.9148                                    | 3.0536         |
| A0A0U1RQF0 | 0.8760                                    | 1.9864         |
| COEA1      | 0.8603                                    | 4.5370         |
| PRELP      | 0.7416                                    | 2.2750         |
| IGHA1      | 0.7230                                    | 2.7757         |
| CRIP1      | 0.7221                                    | 1.9329         |
| TSTD1      | 0.6389                                    | 2.8417         |
| FETUA      | 0.5086                                    | 2.3757         |
| PDIA3      | -0.4048                                   | 4.3970         |
| HPT        | -0.5067                                   | 3.0001         |
| AMPL       | -0.5585                                   | 3.1086         |
| RRBP1      | -0.5964                                   | 2.3236         |
| COTL1      | -0.6370                                   | 2.3605         |
| PDIA4      | -0.6595                                   | 2.2459         |
| B2MG       | -0.6860                                   | 1.9973         |
| CALR       | -0.6996                                   | 3.0303         |
| PLSL       | -0.7038                                   | 2.2539         |
| G8JLJ2     | -0.8113                                   | 2.2459         |
| 1A68       | -0.8126                                   | 1.8990         |
| COR1A      | -0.9126                                   | 2.3672         |
| D6RGG3     | -1.0425                                   | 1.9797         |

**Table S2** Differential proteins between large breast cancer tumour sample (CP629057) and healthy breast tissue sample (CP565563). A positive log<sub>2</sub> fold-change represents higher quantitation in CP629057, while a negative log<sub>2</sub> fold-change represents lower quantitation in CP629057.

| Entry name | Difference (log <sub>2</sub> fold change) | -Log (P-value) |
|------------|-------------------------------------------|----------------|
| PGS2       | 1.9054                                    | 5.3660         |
| APOD       | 1.4028                                    | 2.8374         |
| ASPN       | 1.2213                                    | 2.1361         |
| A0A087X0Q4 | 1.1844                                    | 2.5353         |
| LUM        | 1.0694                                    | 2.7730         |
| PGS1       | 1.0584                                    | 2.7877         |
| COEA1      | 1.0255                                    | 4.1710         |
| KV401      | 1.0200                                    | 2.6614         |
| AACT       | 0.9721                                    | 1.7297         |
| A1AG1      | 0.9225                                    | 2.2135         |
| PEDF       | 0.8875                                    | 2.3861         |
| CO6A1      | 0.8784                                    | 4.8144         |
| PRELP      | 0.8405                                    | 3.8573         |
| SAA4       | 0.8358                                    | 2.4730         |
| A0A075B7D0 | 0.8068                                    | 2.7062         |
| VTNC       | 0.7548                                    | 3.1457         |
| CO1A1      | 0.7428                                    | 2.0208         |
| UGDH       | 0.7095                                    | 2.3879         |
| CO6A2      | 0.7024                                    | 2.3957         |
| HV372      | 0.6500                                    | 2.4502         |
| IGHM       | 0.6445                                    | 3.4325         |
| Q5VY30     | 0.6386                                    | 2.9890         |
| E7ENL6     | 0.6227                                    | 3.4989         |
| FINC       | 0.6195                                    | 3.0638         |
| KV311      | 0.5986                                    | 2.5007         |
| Q86W61     | 0.5837                                    | 2.1772         |
| CFAB       | 0.5165                                    | 2.3721         |
| A0A1B0GW44 | 0.5074                                    | 3.9852         |
| CERU       | 0.5070                                    | 3.4725         |
| A0A024R6I7 | 0.4957                                    | 2.4725         |
| A0A2Q2TTZ9 | 0.4664                                    | 2.2429         |
| CLUS       | 0.4394                                    | 2.3235         |
| KV315      | 0.4329                                    | 2.5531         |
| RL4        | -0.3769                                   | 2.7780         |
| PDIA3      | -0.4229                                   | 3.5234         |
| PRDX1      | -0.5114                                   | 2.5553         |
| AMPL       | -0.5237                                   | 3.0538         |
| B2MG       | -0.5299                                   | 1.9586         |
| CAPG       | -0.5454                                   | 2.0225         |
| H2B1L      | -0.5563                                   | 3.5192         |
| H10        | -0.5588                                   | 2.3467         |
| H4         | -0.5728                                   | 2.3498         |
| D6RGG3     | -0.5757                                   | 1.8373         |

|        |         |        |
|--------|---------|--------|
| PLSL   | -0.5794 | 1.8269 |
| COR1A  | -0.6014 | 1.9179 |
| H7C3Z9 | -0.6613 | 1.9516 |
| TXND5  | -0.6686 | 2.0276 |
| CALR   | -0.6798 | 2.7877 |
| MYH9   | -0.6997 | 1.7109 |
| 1A68   | -0.7220 | 1.8237 |
| FABP4  | -0.8637 | 1.6655 |
| PDIA4  | -0.8780 | 2.4312 |
| GPDA   | -0.9933 | 1.6897 |
| H14    | -1.1660 | 1.8873 |
| H15    | -1.1741 | 2.1172 |
| GSTM1  | -1.6072 | 1.9245 |

**Table S3** Differential proteins between small breast cancer tumour sample (CP531533) and large breast cancer tumour sample (CP629057). A positive log<sub>2</sub> fold change represents higher quantitation in CP531533, while a negative log<sub>2</sub> fold-change represents lower quantitation in CP531533.

| Entry name | Difference (log <sub>2</sub> fold change) | -Log (P-value) |
|------------|-------------------------------------------|----------------|
| ARY1       | 1.4919                                    | 1.7584         |
| S10A7      | 1.1148                                    | 1.9707         |
| K1C18      | 1.0970                                    | 3.2983         |
| A0A1B0GTP7 | 0.8750                                    | 1.9208         |
| ZA2G       | 0.6807                                    | 3.1148         |
| GPDA       | 0.6371                                    | 2.1100         |
| LG3BP      | 0.5929                                    | 2.3996         |
| IGLC7      | 0.5393                                    | 2.5103         |
| HBA        | 0.5240                                    | 2.1995         |
| A0A0U1RQF0 | 0.4963                                    | 2.2113         |
| IGHA1      | 0.4561                                    | 2.3325         |
| PGS2       | -0.3957                                   | 3.1020         |
| KV315      | -0.4488                                   | 2.6724         |
| A0A1B0GW44 | -0.4589                                   | 3.7245         |
| PGS1       | -0.4996                                   | 2.3232         |
| K1C19      | -0.5149                                   | 2.1819         |
| CO6A1      | -0.5190                                   | 3.5702         |
| KV320      | -0.5491                                   | 2.3448         |
| S4R460     | -0.5560                                   | 2.5544         |
| A0A087X0Q4 | -0.6037                                   | 2.0149         |
| A0A075B7D0 | -0.6398                                   | 2.9110         |
| Q86W61     | -0.6604                                   | 3.0031         |
| SAA4       | -0.6925                                   | 2.9318         |
| KV401      | -0.7706                                   | 4.3283         |
| IPLL5      | -0.8840                                   | 1.7762         |
| AACT       | -1.1247                                   | 2.5351         |
| APOD       | -1.1963                                   | 2.6265         |

**Supplementary Design File**

**STL File 1.** Design file for the DMF-HPLC manifold.

**Supplementary Movie**

**Movie S1.** Droplets with different DDM concentrations moving at different velocities.
